# Supplementary material for: PD-L1 targeting high-affinity NK (t-haNK) cells induce direct antitumor effects and target suppressive MDSC populations
Source: PubMed Central journal article supplement — J Immunother Cancer. 2020 May 20;8(1):e000450. doi: 10.1136/jitc-2019-000450 (PMC7247398; doi:10.1136/jitc-2019-000450), 2020-05-20
Supplement: jitc-2019-000450supp001.pdf [file jitc-2019-000450supp001.pdf]

## Supplementary Materials for

**PD-L1-targeting high-affinity NK cells (PD-L1 t-haNK) induce direct antitumor effects and target suppressive MDSC populations**

Kellsye P. Fabian, Michelle R. Padget, Renee N. Donahue, Kristen Solocinski, Yvette Robbins, Clint T. Allen, John H. Lee<sup>4</sup>, Shahrooz Rabizadeh, Patrick Soon-Shiong, Jeffrey Schlom, James W. Hodge

Document includes:

Table S1. Identification of 135 immune subsets

Table S2. Antibody panels

Fig. S1. Transcript changes in PD-L1 CAR haNK vs haNK cells

Table S3. Ingenuity pathway analysis (IPA) of the transcripts deregulated in PD-L1 CAR haNK vs haNK

Fig. S2. PD-L1 t-haNK and haNK killing measured using real-time impedance-based cell assay

Fig. S3. PD-L1 t-haNK induced the lysis of human gastric cancer cell lines

Fig. S4. PD-L1 t-haNK tracking *in vivo*

**Table S1. Identification of 135 immune subsets**

1. **CD4:** Helper T lymphocytes (33 subsets)
2. **CD8:** Cytotoxic T lymphocytes (29 subsets)
  - **Maturation status of T lymphocytes (in CD4 and CD8):**
    - **Naïve:** CD45RA<sup>+</sup> CCR7<sup>+</sup>
    - **Central Memory:** CD45RA<sup>-</sup> CCR7<sup>+</sup>
    - **Effector Memory:** CD45RA<sup>-</sup> CCR7<sup>-</sup>
    - **Terminal (EMRA):** CD45RA<sup>+</sup> CCR7<sup>-</sup>
  - **T lymphocyte markers (in total and memory CD4 and CD8):**
    - **CTLA-4:** inhibition
    - **PD-1:** activation/inhibition
    - **PD-L1:** activation/cross-inhibition
    - **TIM-3:** inhibition
    - **41BB:** co-stimulation
    - **ICOS:** activation (only on CD4)
    - **Ki67:** proliferation
3. **Tregs:** Regulatory T lymphocytes (CD4<sup>+</sup> CD25<sup>+</sup> FoxP3<sup>+</sup> CD127<sup>-</sup>) (10 subsets)
  - **CD45RA:** Tregs highly expandable *in vitro*
  - **CTLA-4:** Treg suppression
  - **CD49d:** “contaminating” effector lymphocytes (non-Tregs)
  - **ICOS:** Treg suppression
  - **PD-1:** activation/inhibition
  - **PD-L1:** cross-inhibition
  - **CD38:** Treg suppression
  - **HLA-DR:** Treg suppression
  - **Ki67:** proliferation
4. **B lymphocytes:** CD19<sup>+</sup> (3 subsets)
  - **PD-1:** activation/inhibition
  - **PD-L1:** cross-inhibition
5. **NK:** Natural killer cells (CD56<sup>+</sup> CD3<sup>-</sup>) (32 subsets)
  - **CD16<sup>+</sup> CD56<sup>dim</sup>:** Mature NK, lytic
  - **CD16<sup>+</sup> CD56<sup>br</sup>:** Functional intermediate, lytic, cytokine production
  - **CD16<sup>-</sup> CD56<sup>br</sup>:** Immature, cytokine production, abundant in placenta
  - **CD16<sup>-</sup> CD56<sup>dim</sup>:** non-lytic, non-cytokine production
  - **TIM-3:** activation
  - **PD-1:** activation/inhibition
  - **PD-L1:** cross-inhibition
  - **DNAM1:** adhesion/activation
  - **NKG2d:** activation
  - **NKp30:** activation
  - **NKp46:** activation
  - **HLADR:** proliferative activity, cytotoxic activity, cytokine production
  - **Ki67:** proliferation
6. **NK-T:** CD56<sup>+</sup> CD3<sup>+</sup> (4 subsets)
  - **TIM-3:** activation
  - **PD-1:** activation/inhibition
  - **PD-L1:** cross-inhibition
7. **cDCs (Conventional DCs):** CD3<sup>-</sup>CD56<sup>-</sup> HLA-DR<sup>+</sup>CD1c<sup>+</sup>CD303<sup>-</sup> (4 subsets)
8. **pDCs (plasmacytoid DCs):** CD3<sup>-</sup>CD56<sup>-</sup> HLA-DR<sup>+</sup>CD1c<sup>-</sup>CD303<sup>+</sup> (4 subsets)
  - **Markers of DC activation**
    - **TIM-3:** inhibition
    - **PD-L1:** cross-inhibition
    - **PD1:** activation/inhibition
9. **MDSCs:** Myeloid-derived suppressor cells (CD11b<sup>+</sup> HLA-DR<sup>low/-</sup> CD33<sup>+</sup>) (16 subsets)
  - **CD14:** Common Myeloid Marker (high in monocytes, dim in granulocytes)
  - **CD15:** Granulocyte marker
  - **CD16:** most immature monocytic MDSCs
  - **PD-1:** activation/inhibition
  - **PD-L1:** cross-inhibition

Table S2. Antibody panels

| Panel 1: T cells |               |           | Panel 2: Tregs |               |            | Panel 3: NK/DC |               |           | Panel 4: MDSC /B cells |               |           |
|------------------|---------------|-----------|----------------|---------------|------------|----------------|---------------|-----------|------------------------|---------------|-----------|
| Antibody         | Company       | Catalog # | Antibody       | Company       | Catalog #  | Antibody       | Company       | Catalog # | Antibody               | Company       | Catalog # |
| CTLA4            | LS Bio        | Is-c62860 | CTLA4          | LS Bio        | Is-c62860  | CD3            | Biolegend     | 300306    | CD15                   | Biolegend     | 301904    |
| PD-1             | Biolegend     | 329906    | PD-1           | Biolegend     | 329906     | PD-1           | Biolegend     | 329906    | PD-1                   | Biolegend     | 329906    |
| 4-1BB            | Biolegend     | 309814    | ICOS           | Biolegend     | 313518     | CD303          | Biolegend     | 354210    | CD19                   | Biolegend     | 302230    |
| PD-L1            | BD Bioscience | 558017    | PD-L1          | BD Bioscience | 558017     | PD-L1          | BD Bioscience | 558017    | PD-L1                  | BD Bioscience | 558017    |
| Tim3             | Biolegend     | 345008    | <u>FoxP3**</u> | Biolegend     | 320116     | Tim3           | Biolegend     | 345008    | CD14                   | Biolegend     | 301830    |
| CCR7             | Biolegend     | 353232    | CD49d          | Biolegend     | 304318     | NKp30          | BD Bioscience | 743170    | CD16                   | Biolegend     | 302048    |
| CD4              | Biolegend     | 317438    | CD4            | Biolegend     | 317438     | CD56           | Biolegend     | 318334    | HLA-DR                 | Biolegend     | 307640    |
| <u>Ki67**</u>    | Biolegend     | 350516    | <u>Ki67**</u>  | Biolegend     | 350516     | NKp46          | Biolegend     | 331927    | CD11b                  | Biolegend     | 101243    |
| CD8              | Biolegend     | 301046    | CD38           | Biolegend     | 303530     | <u>Ki67**</u>  | Biolegend     | 350516    | live/dead              | Invitrogen    | L23105    |
| live/dead        | Invitrogen    | L23105    | HLA-DR         | BD Bioscience | 564040     | NKG2D          | BD Bioscience | 743560    | CD33                   | Biolegend     | 303408    |
| CD45RA           | Biolegend     | 304120    | live/dead      | Invitrogen    | L23105     | CD226          | BD Bioscience | 742498    |                        |               |           |
|                  |               |           | CD25           | Biolegend     | 356110     | live/dead      | Invitrogen    | L23105    |                        |               |           |
|                  |               |           | CD45RA         | Biolegend     | 304120     | HLA-DR         | Biolegend     | 307610    |                        |               |           |
|                  |               |           | CD127          | Ebioscience   | 47-1278-42 | CD16           | Biolegend     | 302026    |                        |               |           |
|                  |               |           |                |               |            | CD1c           | Biolegend     | 331520    |                        |               |           |

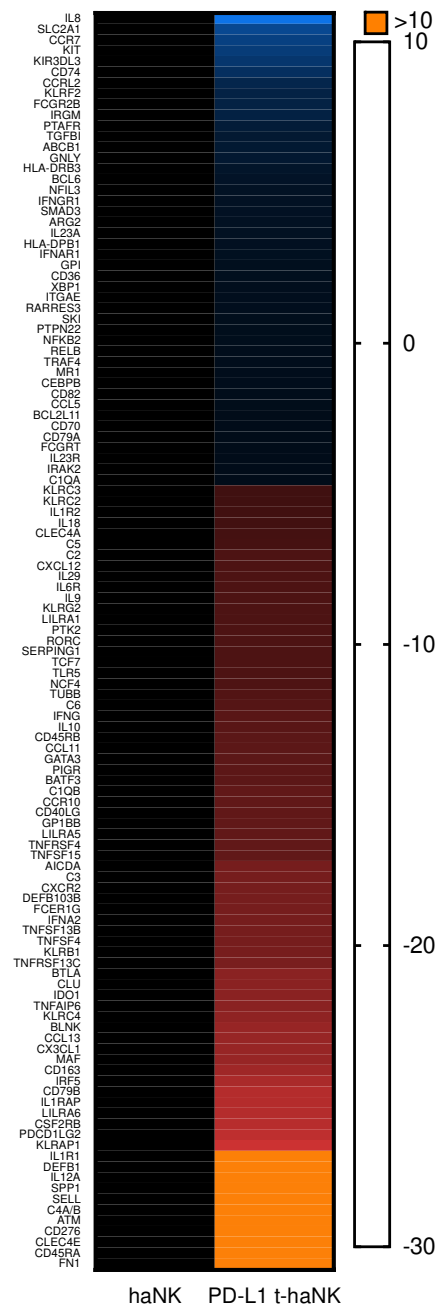

**Figure S1. Transcript changes in PD-L1 t-haNK vs haNK cells.** nCounter was run to compare PD-L1 t-haNK and haNK gene expression. Reported are transcripts changed by greater than 3 fold.

**Table S3. Ingenuity pathway analysis (IPA) of the transcripts deregulated in PD-L1 t-haNK vs haNK.** Transcripts deregulated by >3 fold in PD-L1 t-haNK vs haNK were selected and used for analysis by IPA 4.0 (Ingenuity Systems Inc., [www.ingenuity.com](http://www.ingenuity.com)). Here are reported the top classes in each category.

| Top Canonical Pathways                                      |          |         |
|-------------------------------------------------------------|----------|---------|
| Name                                                        | p-value  | Overlap |
| T Helper Cell Differentiation                               | 9.99E-12 | 23.3%   |
| Th17 Activation Pathway                                     | 9.99E-12 | 23.3%   |
| Altered T Cell and B cell Signaling in Rheumatoid Arthritis | 3.28E-11 | 20.8%   |
| Hepatic Fibrosis / Hepatic Stellate Cell Activation         | 9.23E-11 | 15.5%   |
| Th1 Pathway                                                 | 2.23E-09 | 13.9%   |

  

| Top Diseases and Bio Functions |                     |             |
|--------------------------------|---------------------|-------------|
| Diseases and Disorders         |                     |             |
| Name                           | p-value range       | # Molecules |
| Inflammatory Response          | 4.16E-02 - 1.02E-05 | 12          |
| Immunological Disease          | 1.06E-02 - 8.12E-04 | 3           |

  

| Molecular and Cellular Functions       |                     |             |
|----------------------------------------|---------------------|-------------|
| Name                                   | p-value range       | # Molecules |
| Cellular Development                   | 2.21E-02 - 1.48E-08 | 11          |
| Cellular Growth and Proliferation      | 3.14E-02 - 1.48E-08 | 11          |
| Cell-To-Cell Signaling and Interaction | 4.16E-02 - 9.04E-08 | 10          |
| Cellular Movement                      | 4.16E-02 - 1.37E-07 | 7           |
| Cellular Function and Maintenance      | 2.21E-02 - 1.91E-06 | 11          |

  

| Physiological System Development and Function |                     |             |
|-----------------------------------------------|---------------------|-------------|
| Name                                          | p-value range       | # Molecules |
| Hematological System Development and Function | 4.16E-02 - 1.48E-08 | 21          |
| Lymphoid Tissue Structure and Development     | 2.21E-02 - 1.48E-08 | 17          |
| Tissue Morphology                             | 2.10E-02 - 7.31E-08 | 9           |
| Immune Cell Trafficking                       | 4.16E-02 - 1.37E-07 | 12          |
| Cell-mediated Immune Response                 | 4.16E-02 - 1.91E-06 | 9           |

  

| Top Networks                                                                                              |       |
|-----------------------------------------------------------------------------------------------------------|-------|
| Associated Network Functions                                                                              | Score |
| Cell-To-Cell Signaling and Interaction, Hematological System Development and Function, Immune Trafficking | 7     |
| Lymphoid Tissue Structure and Development, Tissue Morphology, Cell-mediated Immune Response               | 4     |
| Cellular Movement, Hematological System Development and Function, Immune Cell Trafficking                 | 1     |
| Cell Death and Survival, Cellular Compromise, Inflammatory Response                                       | 1     |
| Cell Death and Survival, Cell-mediated Immune Response, Cellular Development                              | 0     |

Fig. S2

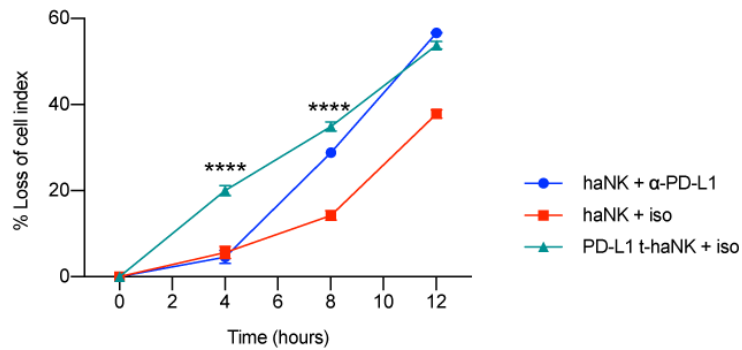

**Fig. S2. PD-L1 t-haNK and haNK killing measured using real-time impedance-based cell assay.**

Real-time impedance-based cell assay (xCELLigence RTCA MP, ACEA) was employed to track the cell death of MDA-MB-231 mediated by irradiated haNK cells with  $\alpha$ -PD-L1 antibody (1  $\mu$ g/mL) and PD-L1 t-haNK over time at 5:1 E:T ratio. MDA-MB-231 (20,000 cells/well) were allowed to grow overnight on impedance plates. When the cell index reached approximately 1.0, haNK and PD-L1 t-haNK cells (100,000 cells) were added to the wells. anti-PD-L1 antibody at a final concentration of 1  $\mu$ g/mL was also added to appropriate wells. The cell index was normalized to the time of NK addition and decrease in cell index was monitored. % decrease in cell lysis was calculated using the formula:  $[(\text{average cell index of control} - \text{cell index of sample}) / \text{average cell index of control}] \times 100$  for each time point. Results shown are the means with SEM of triplicate measurement. Two way ANOVA with Tukey's multiple comparisons test were used for statistical analysis. Significance shown compares PD-L1 t-haNK with haNK with anti-PD-L1 antibody. \*\*\*\* $p < 0.001$ .

Fig. S3

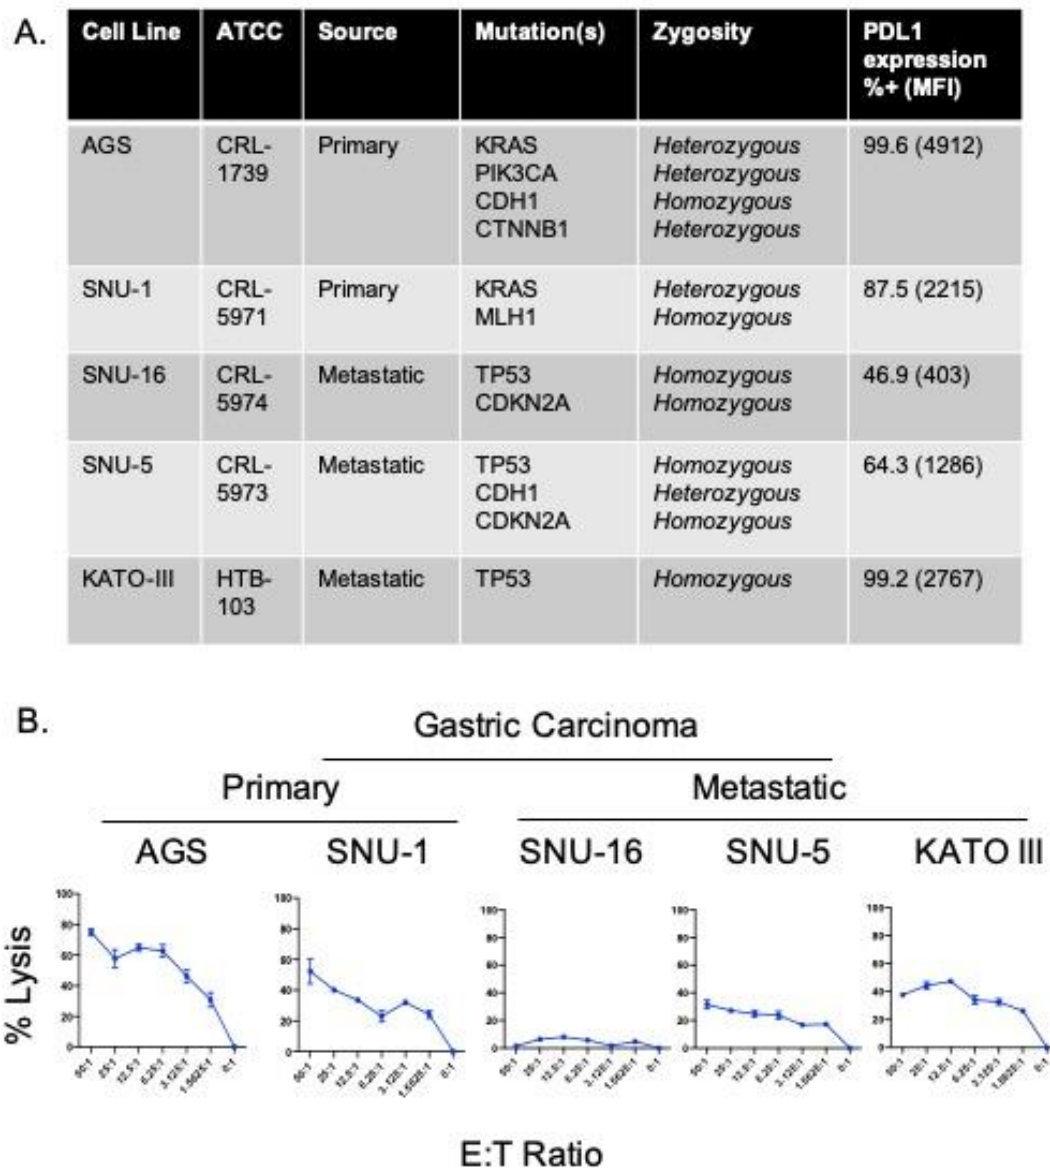

Fig. S4

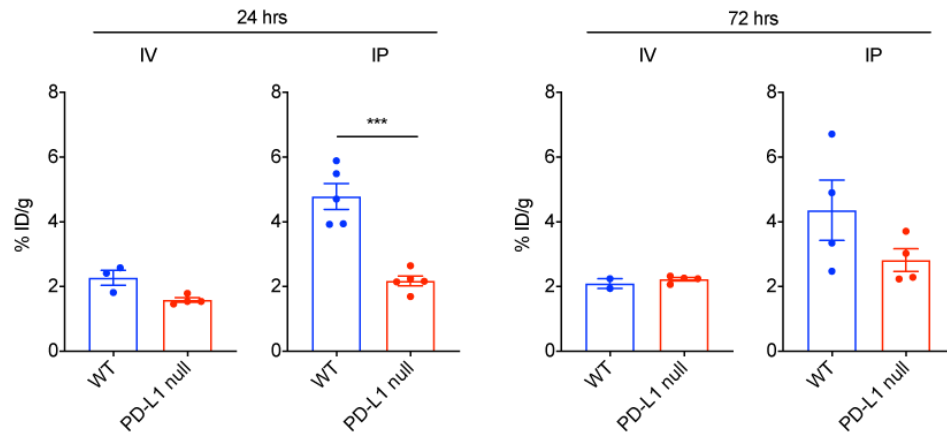

**Fig. S4. PD-L1 t-haNK tracking *in vivo*.** NSG mice (n = 3/group/time point) with established WT MDA-MB-231 and PD-L1 null MDA-MB-231 were injected with  $^{111}\text{In}$ -labeled irradiated PD-L1 CAR haNK (i.p. or i.v.) when the tumors reached  $\sim 100\text{mm}^3$ . 24 hours and 72 hours post-treatment, the tumors were collected and assessed for  $^{111}\text{In}$  signal. Student's *t*-test was used for statistical analysis. \*\*\*p < 0.005.
